# Supplementary material for: The Effect of Heterogeneity on Invasion in Spatial Epidemics: From Theory to Experimental Evidence in a Model System
Source: PubMed Central journal article supplement (PMC3182855; doi:10.1371/journal.pcbi.1002174), 2011-09-29
Supplement: pcbi.1002174.s001.pdf [file pcbi.1002174.s001.pdf]

Table S1: Notional treatments of the population experiment.

| Treatment | Nutrient concentration | Number of occupied sites | Experimental parameters:<br>estimates used to design the experiment |                                         |                                         |                           | Experimental parameters:<br>estimates from populations<br>and within-treatment heterogeneity |                                 |                                     |                        |
|-----------|------------------------|--------------------------|---------------------------------------------------------------------|-----------------------------------------|-----------------------------------------|---------------------------|----------------------------------------------------------------------------------------------|---------------------------------|-------------------------------------|------------------------|
|           |                        |                          | $\psi_{\text{site}}$                                                | $\langle \psi \rangle_{\text{pop}}$     | $\sigma^2_{\text{pop}}$                 | $\mathbf{P}_{\text{inv}}$ | $\hat{\psi}_{\text{site}}(T, r)$                                                             | $\hat{\psi}_{\text{pop}}(T, r)$ | $\hat{\sigma}^2_{\text{pop}}(T, r)$ | $\hat{P}_{\text{inv}}$ |
| <b>A</b>  | 3%                     | 217                      | <b>0.51</b> (0.4, 0.62)                                             | <b>0.51</b> (0.4, 0.62)                 | <b>0</b>                                | <b>0.98</b> (0.81, 1)     | $0.58 \pm 0.08$                                                                              | $0.58 \pm 0.08$                 | 0                                   | 1                      |
| <b>B</b>  | 3.5%                   | 175                      | <b>0.62</b> (0.51, 0.71) <sup>(a)</sup>                             | <b>0.5</b> (0.41, 0.58) <sup>(a)</sup>  | <b>0.06</b> (0.04, 0.08) <sup>(a)</sup> | <b>0.91</b> (0.71, 0.98)  | $0.62 \pm 0.1$                                                                               | $0.5 \pm 0.08$                  | $0.06 \pm 0.02$                     | 0.79                   |
| <b>C</b>  | 4%                     | 146                      | <b>0.73</b> (0.62, 0.81) <sup>(a)</sup>                             | <b>0.49</b> (0.42, 0.54) <sup>(a)</sup> | <b>0.12</b> (0.08, 0.14) <sup>(a)</sup> | <b>0.78</b> (0.61, 0.90)  | $0.63 \pm 0.12$                                                                              | $0.43 \pm 0.08$                 | $0.09 \pm 0.03$                     | 0.72                   |
| <b>D</b>  | 4.5%                   | 125                      | <b>0.84</b> (0.73, 0.90) <sup>(a)</sup>                             | <b>0.48</b> (0.42, 0.52) <sup>(a)</sup> | <b>0.17</b> (0.13, 0.2) <sup>(a)</sup>  | <b>0.67</b> (0.47, 0.82)  | $0.66 \pm 0.09$                                                                              | $0.38 \pm 0.05$                 | $0.11 \pm 0.03$                     | 0.46                   |
| <b>E</b>  | 5%                     | 110                      | <b>0.95</b> (0.84, 1)                                               | <b>0.48</b> (0.43, 0.51)                | <b>0.22</b> (0.18, 0.25)                | <b>0.14</b> (0.05, 0.32)  | $0.7 \pm 0.16$                                                                               | $0.35 \pm 0.08$                 | $0.13 \pm 0.06$                     | 0.04                   |
| <b>F</b>  | 10%                    | 98                       | <b>1</b> (0.94, 1)                                                  | <b>0.45</b> (0.42, 0.45)                | <b>0.25</b> (0.21, 0.25)                | <b>0.03</b> (0.01, 0.17)  | $0.78 \pm 0.16$                                                                              | $0.35 \pm 0.07$                 | $0.16 \pm 0.05$                     | 0.04                   |
