# Supplementary material for: The Effect of Heterogeneity on Invasion in Spatial Epidemics: From Theory to Experimental Evidence in a Model System
Source: PLOS journal article supplement (doi:10.1371/journal.pcbi.1002174), 2011-09-29
Supplement: S2 (10.1371/journal.pcbi.1002174.s002) [file journal.pcbi.1002174.s002]

301 Moved Permanently

# Moved Permanently

The document has moved here.

---

Apache Server at www.ploscompbiol.org Port 80
